# Supplementary material for: Parallel Comparison of 4-1BB or CD28 Co-stimulated CD19-Targeted CAR-T Cells for B Cell Non-Hodgkin’s Lymphoma
Source: PubMed Central journal article supplement — Mol Ther Oncolytics. 2019 Aug 28;15:60–8. doi: 10.1016/j.omto.2019.08.002 (PMC6804784; doi:10.1016/j.omto.2019.08.002), 2019-08-28
Supplement: mmc1.pdf [file mmc1.pdf]

OMTO, Volume 15

## **Supplemental Information**

**Parallel Comparison of 4-1BB or CD28**

**Co-stimulated CD19-Targeted CAR-T Cells**

**for B Cell Non-Hodgkin's Lymphoma**

**Zhitao Ying, Ting He, Xiaopei Wang, Wen Zheng, Ningjing Lin, Meifeng Tu, Yan Xie, Lingyan Ping, Chen Zhang, Weiping Liu, Lijuan Deng, Feifei Qi, Yanping Ding, Xin-an Lu, Yuqin Song, and Jun Zhu**

## Supplementary Information

The nucleotide sequence of 28z CAR

GACATCCAGATGACACAGACTACATCCTCCCTGTCTGCCTCTCTGGGAGACAGAGTCACCATCA  
GTTGCAGGGCAAGTCAGGACATTAGTAAATATTTAAATTGGTATCAGCAGAAACCAGATGGAAC  
TGTTAAACTCCTGATCTACCATACATCAAGATTACACTCAGGAGTCCCATCAAGGTTTCAGTGGCA  
GTGGGTCTGGAACAGATTATTCTCTCACCATTAGCAACCTGGAGCAAGAAGATATTGCCACTTA  
CTTTTGCCAACAGGGTAATACGCTTCCGTACACGTTTCGGAGGGGGGACTAAGTTGGAAATAACA  
GGTGGCGGTGGCTCGGGCGGTGGTGGGTTCGGGTGGCGGCGGATCTGAGGTGAAACTGCAGGA  
GTCAGGACCTGGCCTGGTGGCGCCCTCACAGAGCCTGTCCGTACATGCACTGTCTCAGGGGT  
CTCATTACCCGACTATGGTGTAAAGCTGGATTGCCAGCCTCCACGAAAGGGTCTGGAGTGGCTG  
GGAGTAATATGGGGTAGTCAAACACATACTATAATTCAGCTCTCAAATCCAGACTGACCATCA  
TCAAGGACAACCTCAAAGAGCCAAGTTTTCTTAAAAATGAACAGTCTGCAAACCTGATGACACAGC  
CATTTACTACTGTGCCAAACATTATTACTACGGTGGTAGCTATGCTATGGACTACTGGGGTCAAG  
GAACCTCAGTCACCGTCTCCTCAGCGGCCGCAATTGAAGTTATGTATCCTCCTCCTTACCTAGAC  
AATGAGAAGAGCAATGGAACCATTATCCATGTGAAAGGGAAACACCTTTGTCCAAGTCCCCTAT  
TTCCCGGACCTTCTAAGCCCTTTTGGGTGCTGGTGGTGGTTGGGGGAGTCTGGCTTGCTATAG  
CTTGTAGTAACAGTGGCCTTTATTATTTCTGGGTGAGGAGTAAGAGGAGCAGGCTCCTGCAC  
AGTGACTACATGAACATGACTCCCCGCCGCCCGCCACCCGCAAGCATTACCCGCTAT  
CCCCACACGCGACTTCGACGCCTATCGCTCCAGAGTGAAGTTCAGCAGGAGCGCAGACGCC  
CCCGCTACCAGCAGGGCCAGAACCAGCTCTATAACGAGCTCAATCTAGGACGAAGAGAGGA  
GTACGATGTTTTGGACAAGAGACGTGGCCGGACCCTGAGATGGGGGAAAGCCGAGAAGGA  
AGAACCCTCAGGAAGGCCTGTACAATGAACTGCAGAAAGATAAGATGGCGGAGGCCTACAGT  
GAGATTGGGATGAAAGGCGAGCGCCGAGGGGCAAGGGGCACGATGGCCTTACCAGGGTCT  
CAGTACAGCCACCAAGGACACCTACGACGCCCTTCACATGCAGGCCCTGCCCCCCCGCTAA

The nucleotide sequence of BBz CAR

GACATCCAGATGACACAGACTACATCCTCCCTGTCTGCCTCTCTGGGAGACAGAGTCACCATCA  
GTTGCAGGGCAAGTCAGGACATTAGTAAATATTTAAATTGGTATCAGCAGAAACCAGATGGAAC  
TGTTAAACTCCTGATCTACCATACATCAAGATTACACTCAGGAGTCCCATCAAGGTTTCAGTGGCA  
GTGGGTCTGGAACAGATTATTCTCTCACCATTAGCAACCTGGAGCAAGAAGATATTGCCACTTA  
CTTTTGCCAACAGGGTAATACGCTTCCGTACACGTTTCGGAGGGGGGACTAAGTTGGAAATAACA  
GGCTCCACCTCTGGATCCGGCAAGCCCGATCTGGCGAGGGATCCACCAAGGGCGAGGTGAA  
ACTGCAGGAGTCAGGACCTGGCCTGGTGGCGCCCTCACAGAGCCTGTCCGTACATGCACTGT  
CTCAGGGGTCTCATTACCCGACTATGGTGTAAAGCTGGATTGCCAGCCTCCACGAAAGGGTCTG  
GAGTGGCTGGGAGTAATATGGGGTAGTCAAACACATACTATAATTCAGCTCTCAAATCCAGAC  
TGACCATCATCAAGGACAACCTCAAAGAGCCAAGTTTTCTTAAAAATGAACAGTCTGCAAACCTGA  
TGACACAGCCATTTACTACTGTGCCAAACATTATTACTACGGTGGTAGCTATGCTATGGACTACT  
GGGGTCAAGGAACCTCAGTCACCGTCTCCTCAACCACCACCCAGCCCCCGACCACCAACAC  
CCGCCCCACCATCGCCAGCCAGCCCTGAGCCTGCGCCCCGAGGCCTGCCGCCCCGCGCGCC  
GGCGGCGCCGTGCACACCCGCGGCCTGGACTTCGCCTGCGACATCTACATCTGGGCCCCCTG  
GCCGGCACCTGCGGCGTGTGCTGCTGAGCCTGGTGTATCACCCTGTACTGCAAGCGCGGCCG  
AAGAAGCTGCTGTACATCTTCAAGCAGCCCTTCATGCGCCCCGTGCAGACCACCCAGGAGGAG  
GACGGCTGCAGTCCCGCTTCCCCGAGGAGGAGGAGGGCGGCTGCGAGCTGCGCGTGAAGTT  
CAGCCGACGCGCCGACGCCCCCGCCTACAAGCAGGGGCCAGAACCAGCTGTACAACGAGCTGA  
ACCTGGGCCGCGCGAGGAGTACGACGTGCTGGACAAGCGCCGCGGCCGCGACCCCGAGATG  
GGCGGCAAGCCCCGCGCAAGAACCACCAGGAGGGCCTGTACAACGAGCTGCAGAAGGACA  
AGATGGCCGAGGCCTACAGCGAGATCGGCATGAAGGGCGAGCGCCCGCGGCAAGGGCCA  
CGACGGCCTGTACCAGGGCCTGAGCACCGCCACCAAGGACACCTACGACGCCCTGCACATGC  
AGGCCCTGCCCCCCCGCTAA

**Supplementary Figure 1.** The nucleotide sequences of BBz CAR and 28z CAR.

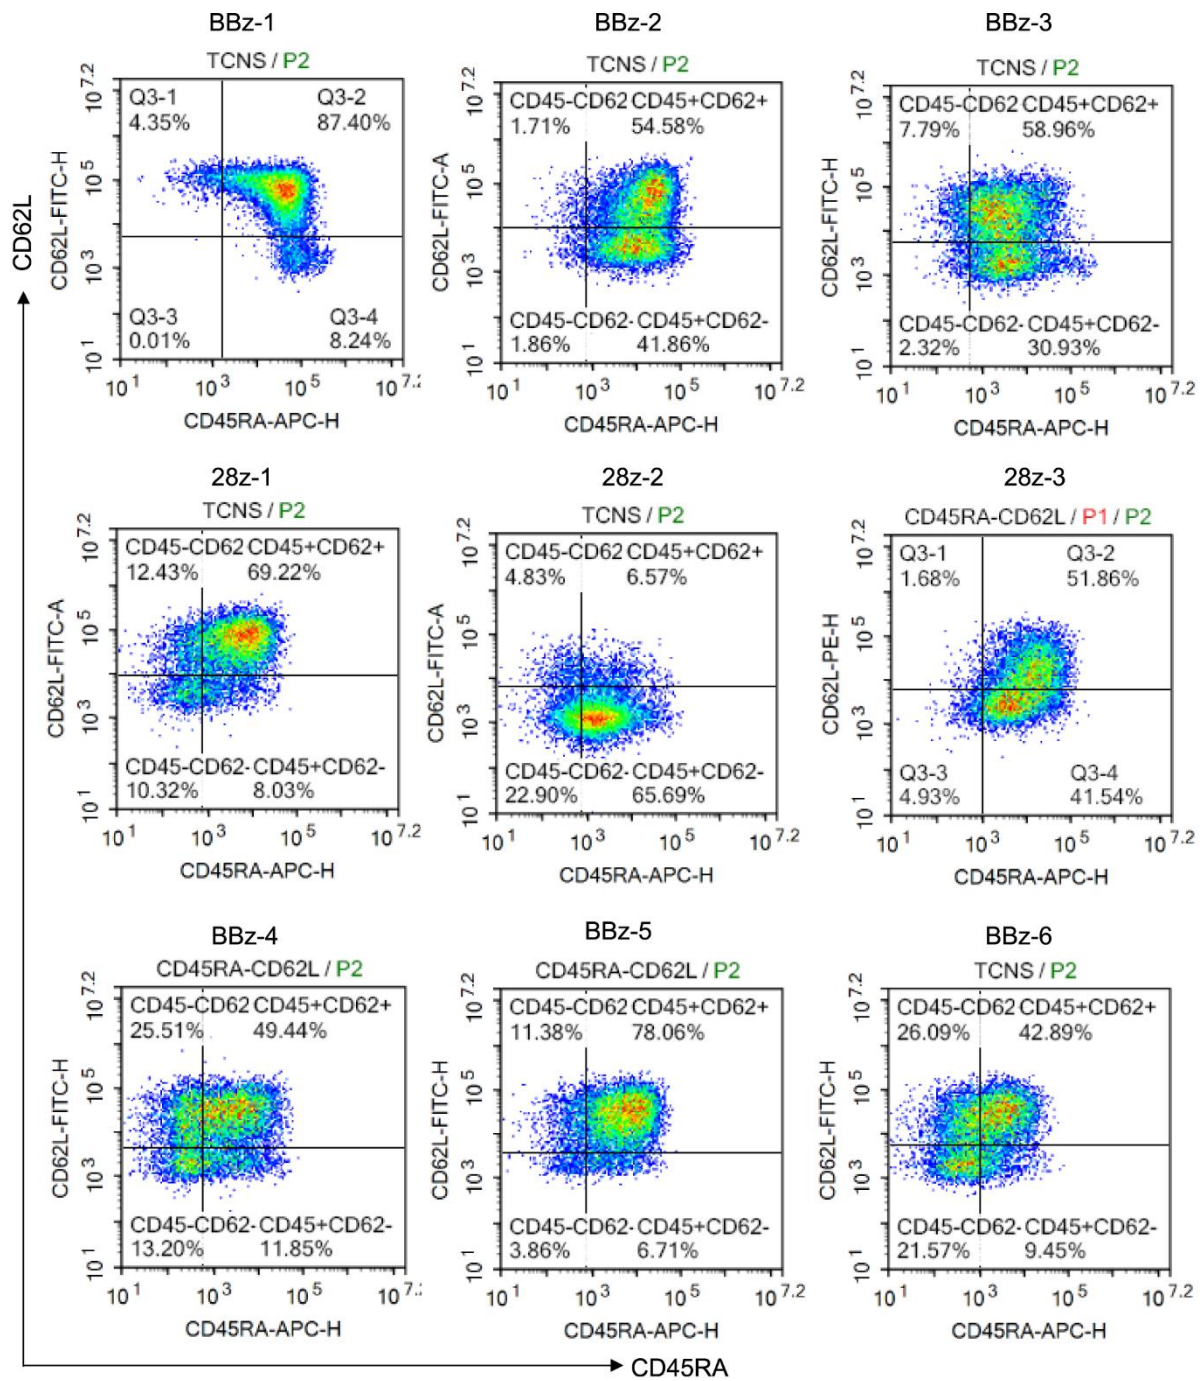

**Supplementary Figure 2.** Representative dot plots of differentiation status of BBz CAR-T and 28z CAR-T cells by flow cytometry analysis of CD45RA and CD62L expression.

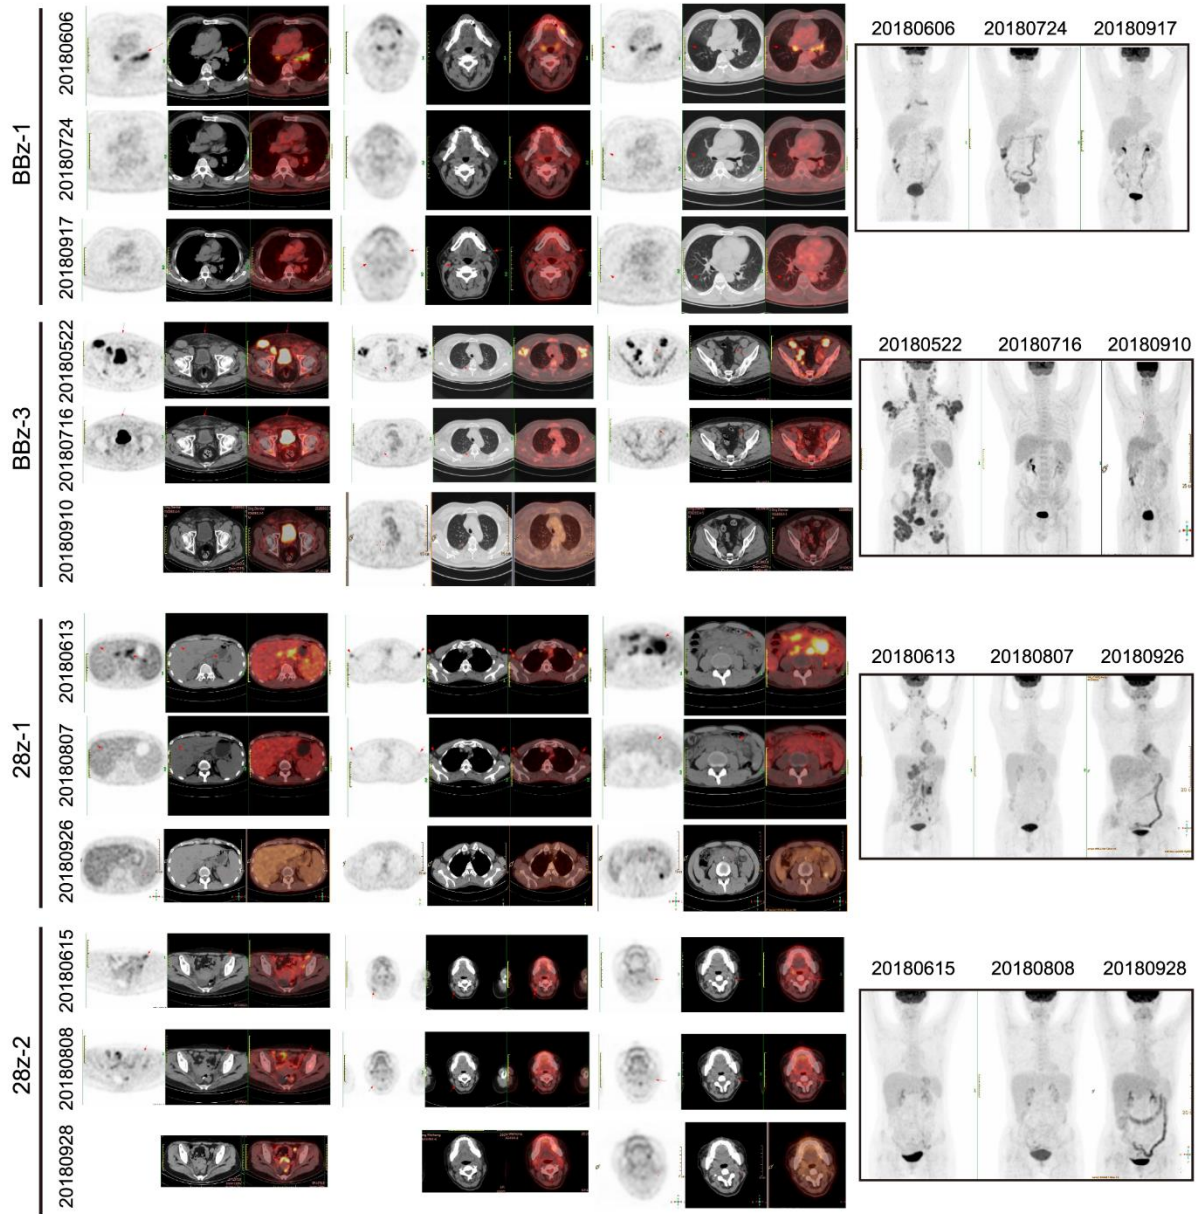

**Supplementary Figure 3.** The PET-CT scanning of patients before, one month, and three months after infusion of indicated CAR-T cells.

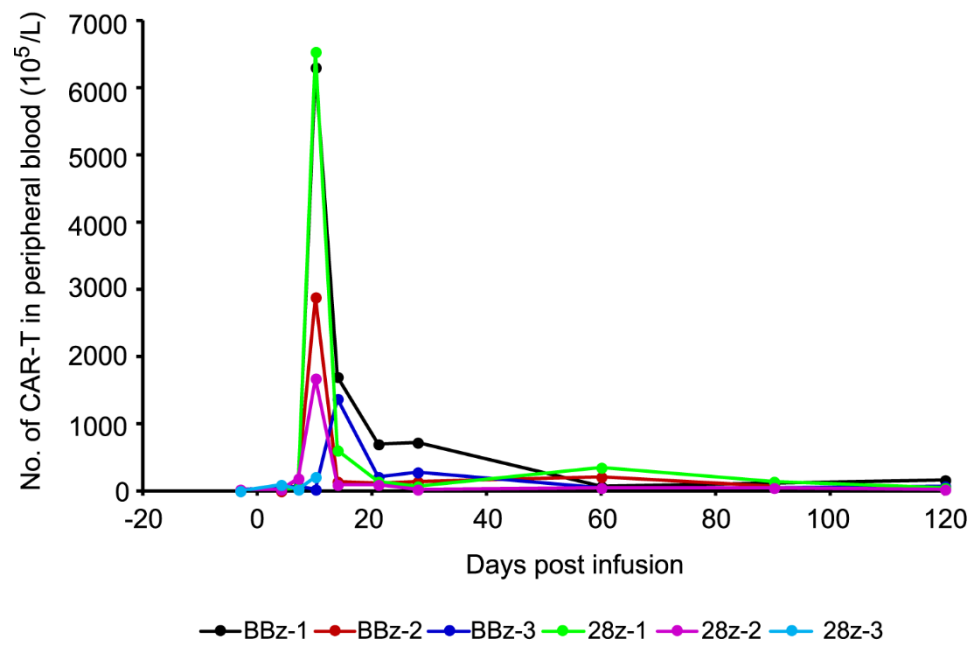

**Supplementary Figure 4.** The number of CAR-T cells in peripheral blood after patients were infused with low dose of CAR-T cells for different time intervals.

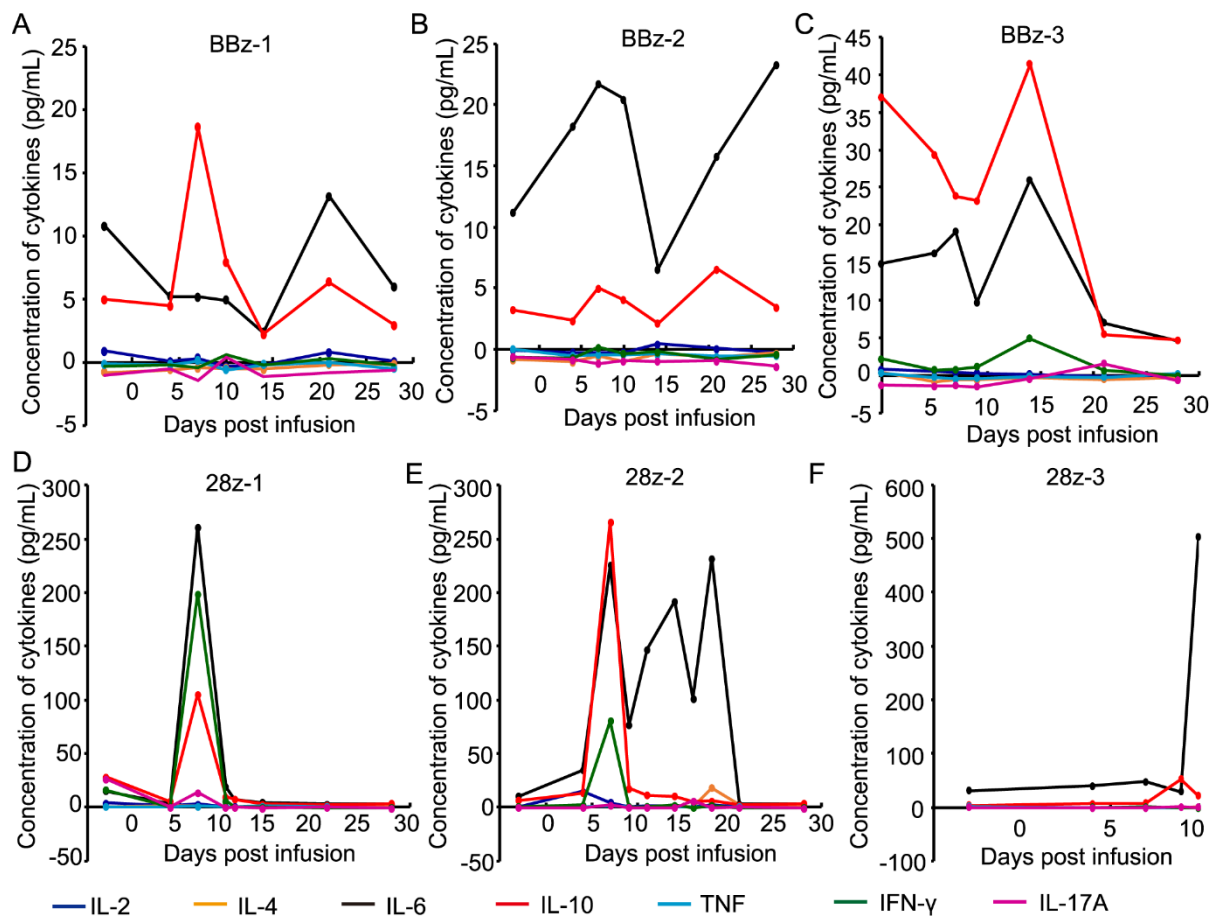

**Supplementary Figure 5.** (A-F) The expression levels of cytokines (IL-2, IL-4, IL-6, IL-10, TNF, IFN- $\gamma$ , and IL-17A) in peripheral blood were evaluated using cytometric bead array in each patient after infusion with indicated CAR-T cells for different time intervals.

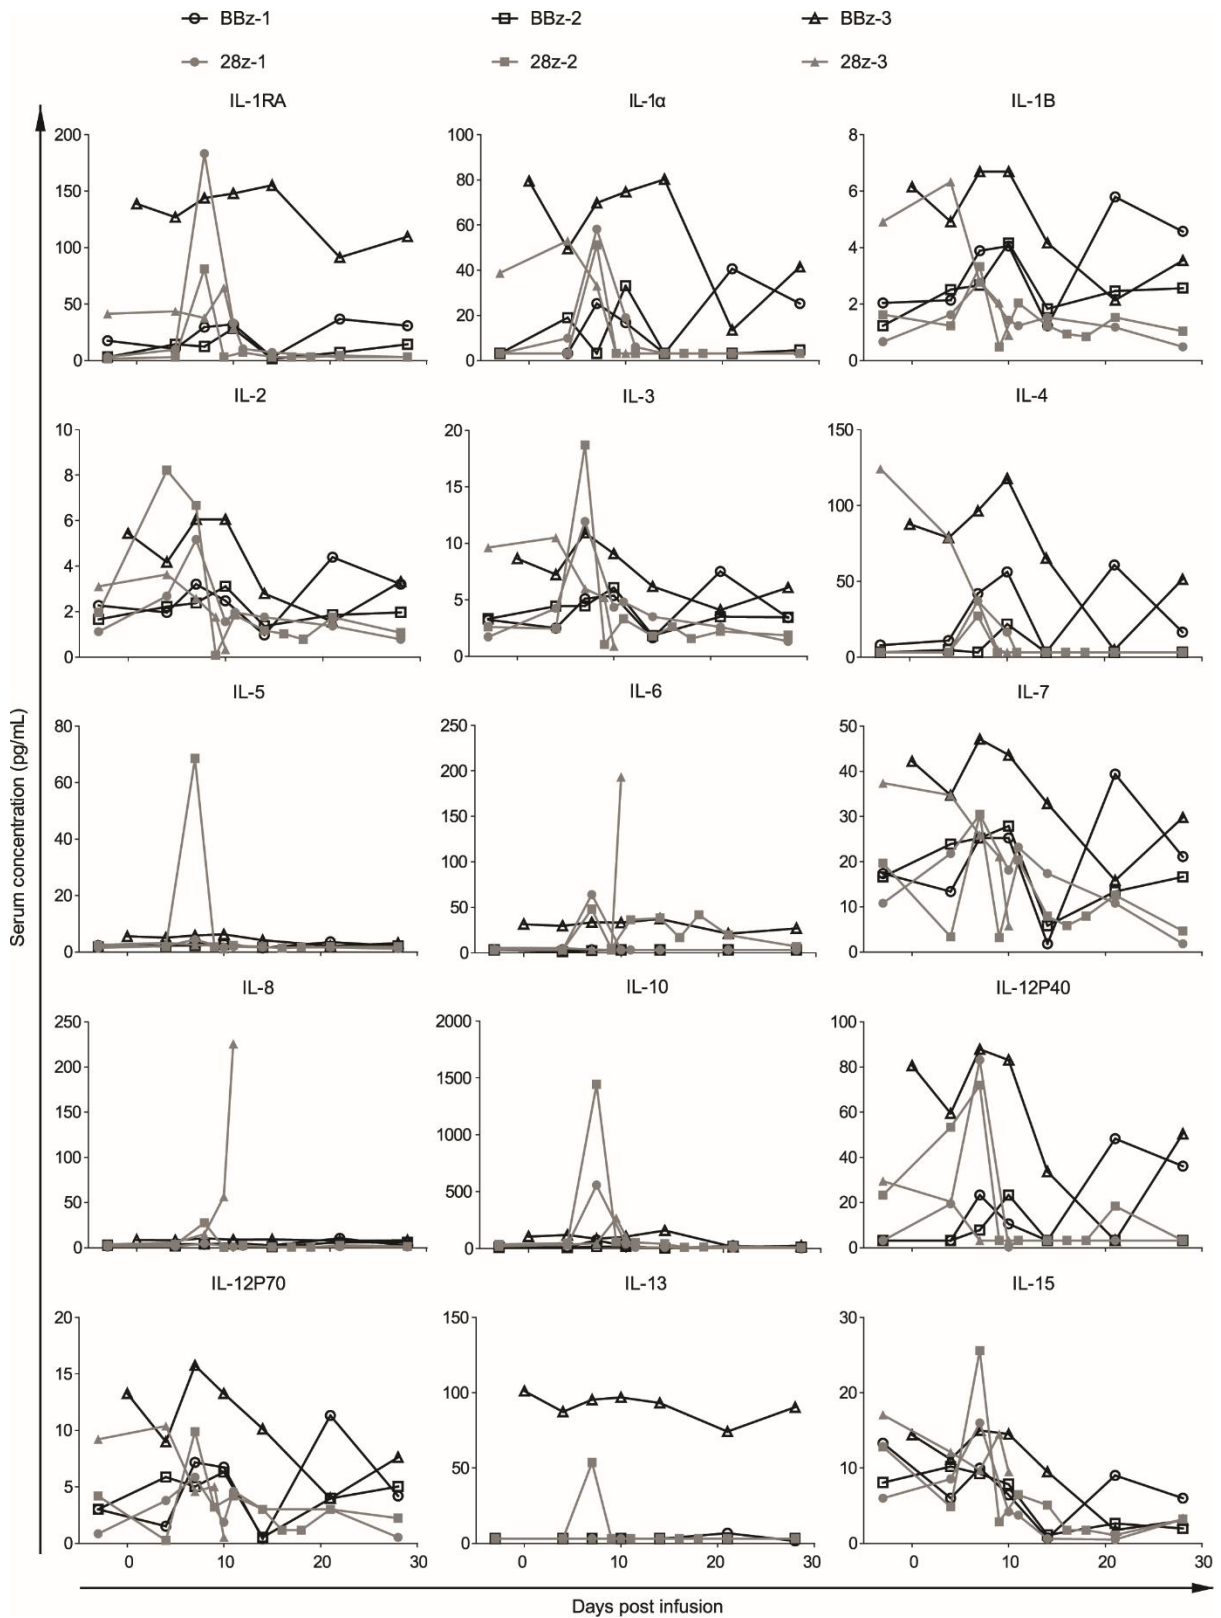

**Supplementary Figure 6.** The levels of indicated serum interleukins of each patient were evaluated using luminex assay.

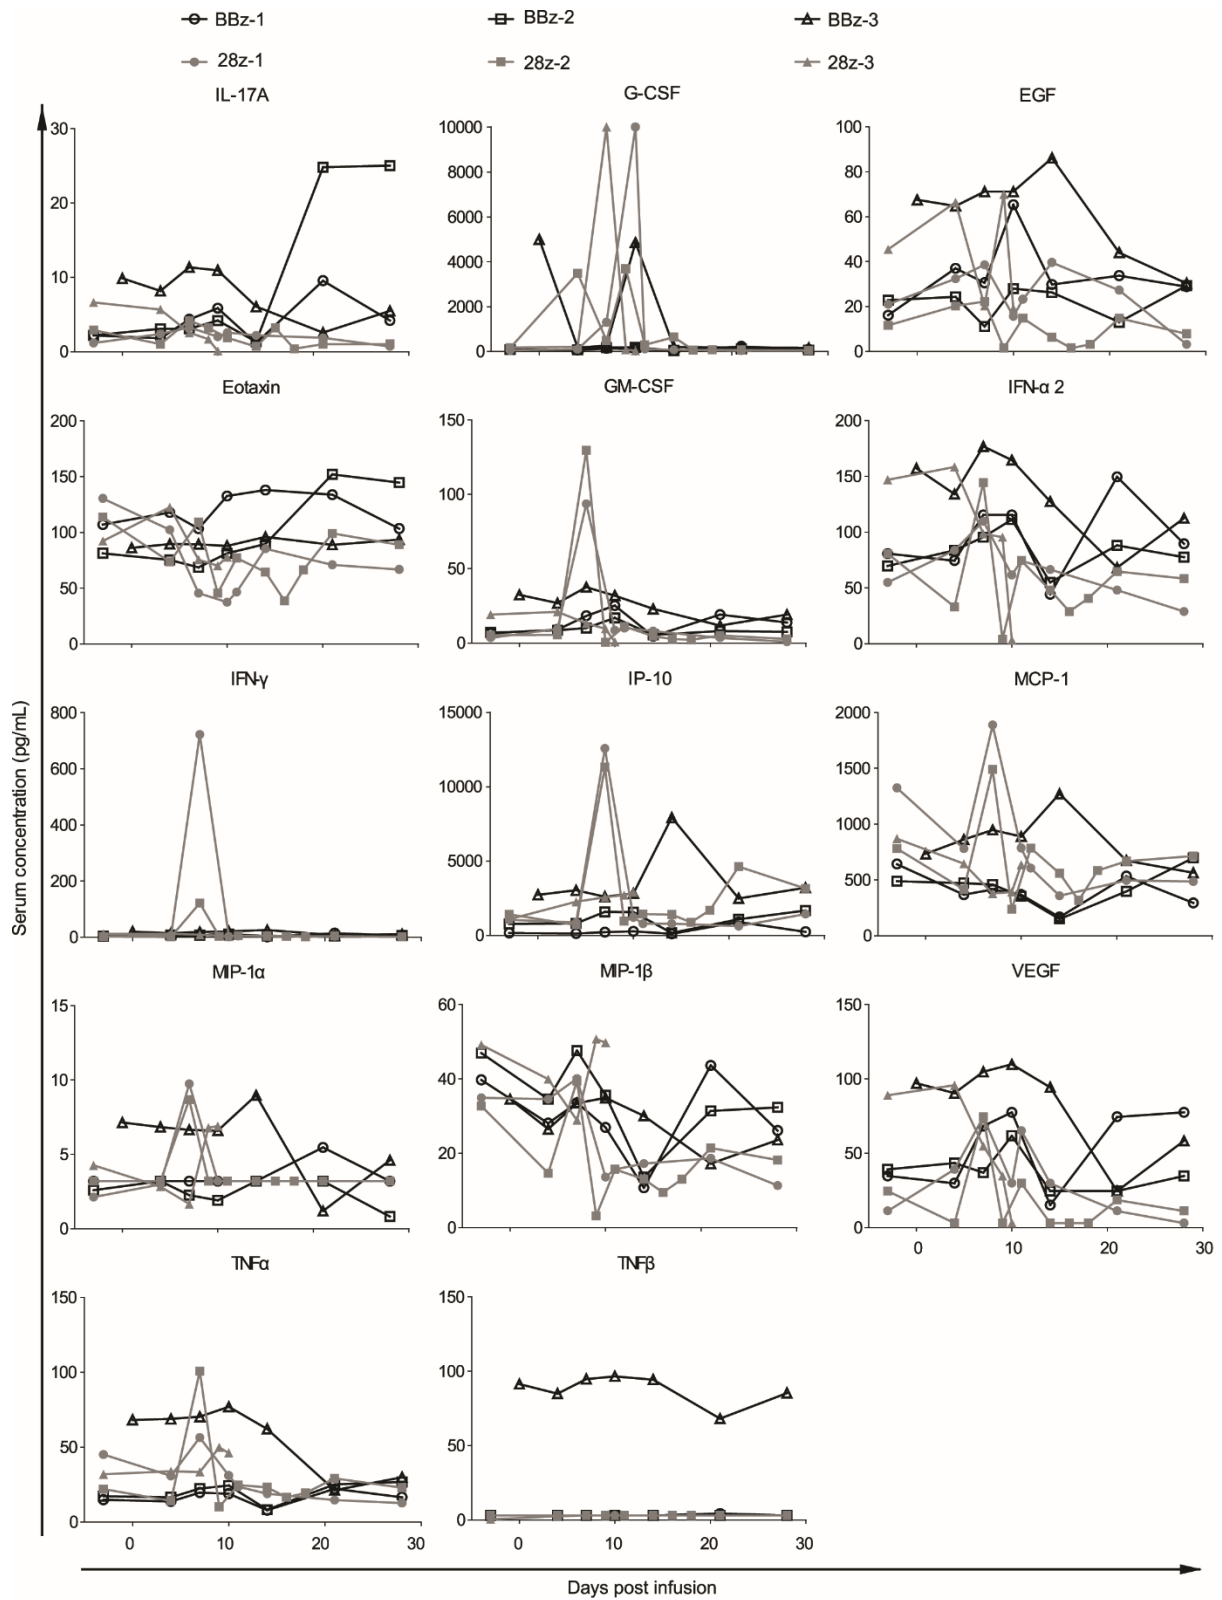

**Supplementary Figure 7.** The levels of indicated inflammatory cytokines and growth factors in serum of each patient were evaluated using luminex assay.



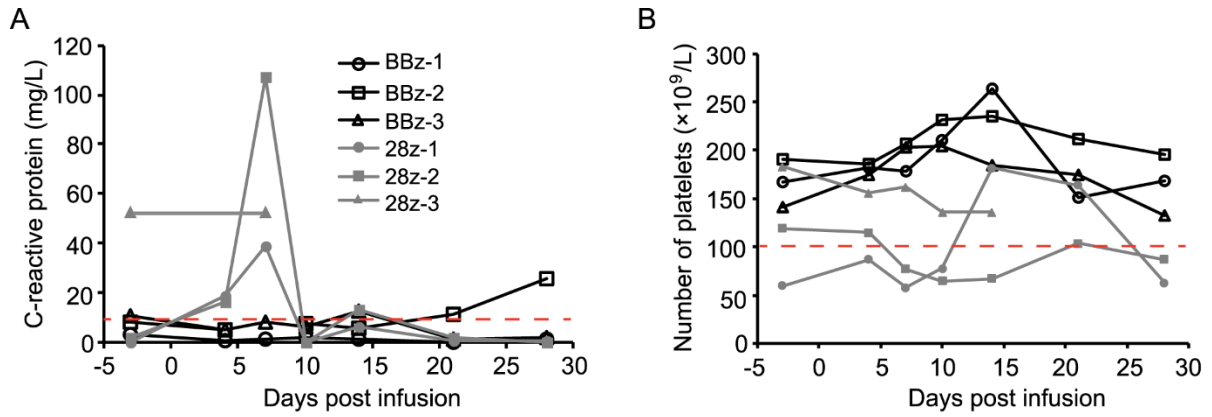

**Supplementary Figure 8.** Comparison of C-reactive protein level and platelet amounts in patients who were treated with BBz CAR-T or 28z CAR-T cells. (A) The level of C-reactive protein was monitored after patients were treated with indicated CAR-T cells. Red dashed showed the normal level at highest. (B) The number of platelets in patients receiving indicated CAR-T cells was followed up. Red dashed showed the normal level at lowest.

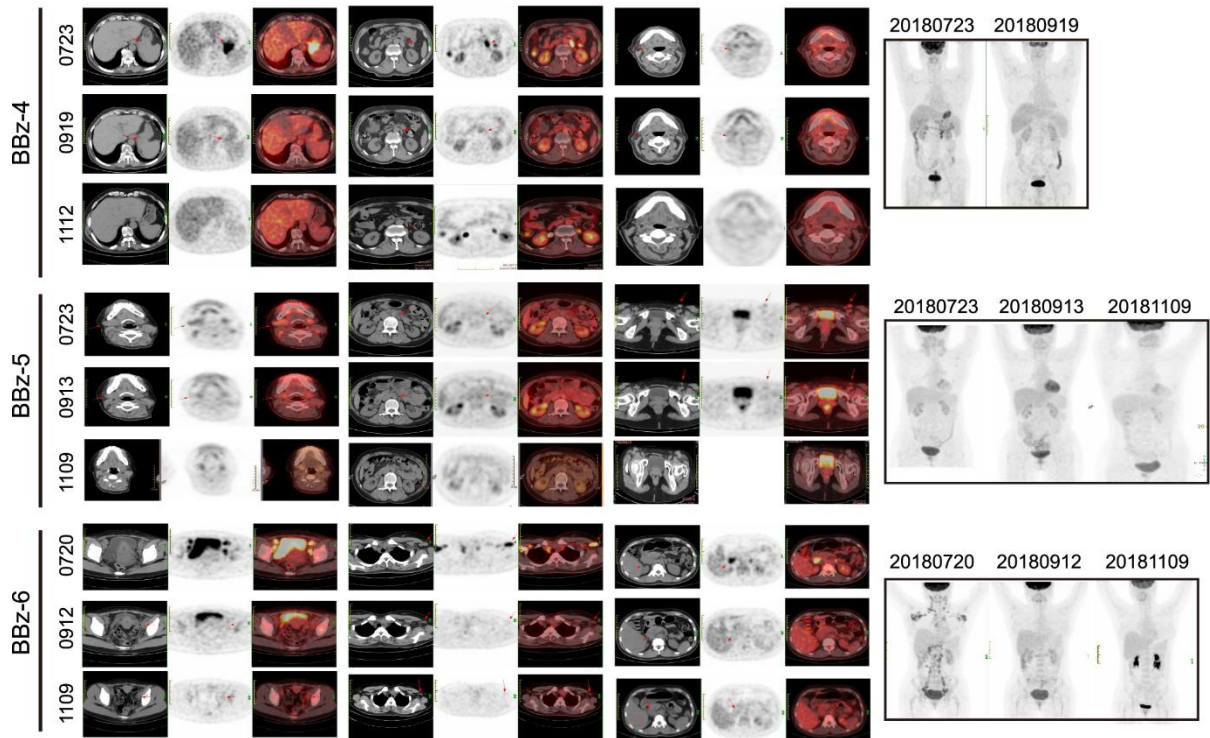

**Supplementary Figure 9.** The cross-sectional PET-CT images of patients who were infused with an elevated dose of CAR-T and all showed complete response.

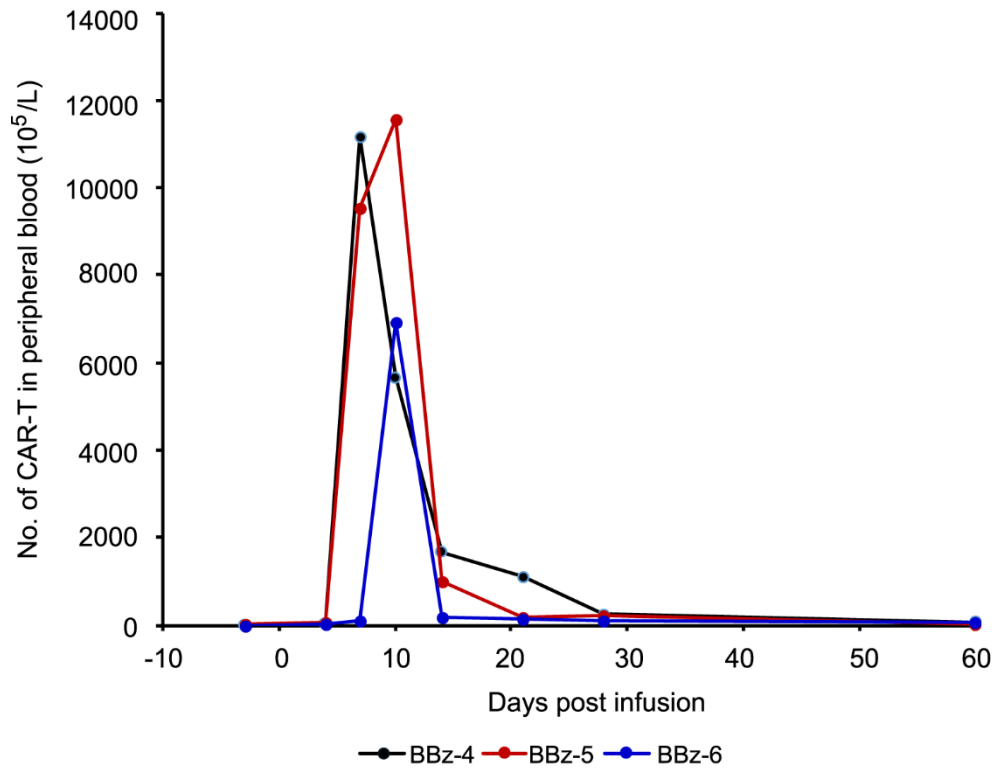

**Supplementary Figure 10.** The number of BBz CAR-T cells in peripheral blood after they were infused to patients at an elevated dose.

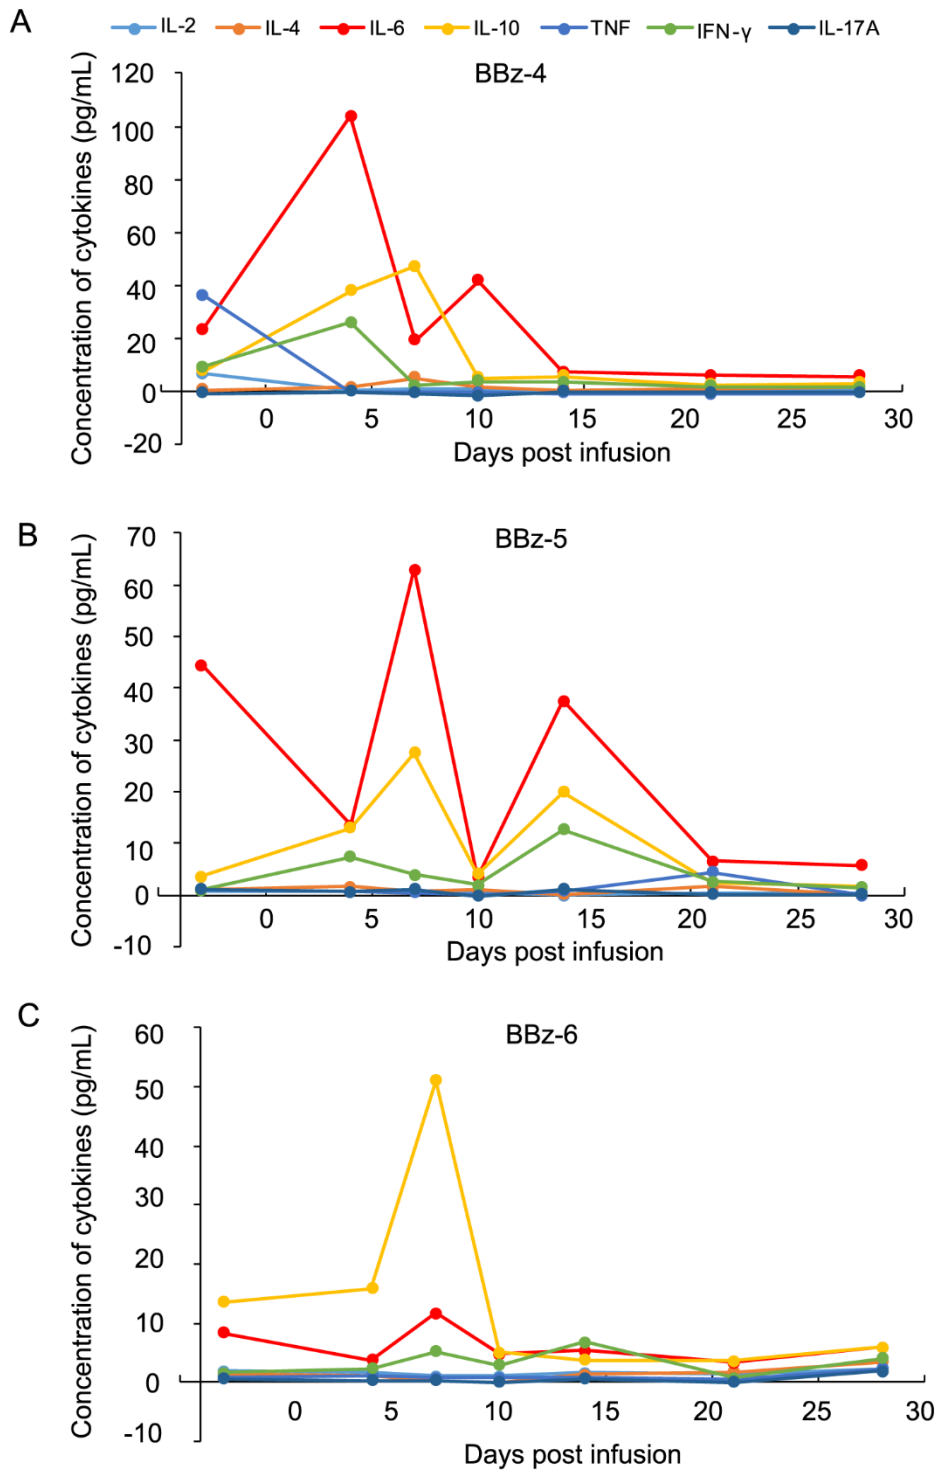

**Supplementary Figure 11.** (A-C) The expression levels of cytokines (IL-2, IL-4, IL-6, IL-10, TNF, IFN- $\gamma$ , and IL-17A) in peripheral blood were evaluated using cytometric bead array in each patient after infusion with an elevated dose of CAR-T cells for different time intervals.

**Supplementary Table 1. Detailed chemotherapy regimens for patients before enrollment**

| Chemotherapy regimen | Components                                                    |
|----------------------|---------------------------------------------------------------|
| CHOP                 | Cyclophosphamide, Doxorubicin, Oncovin, Prednisone            |
| R-CHOP               | Rituximab, Cyclophosphamide, Doxorubicin, Oncovin, Prednisone |
| R-DDP+VP-16+DXM      | Rituximab, Cisplatin, Etoposide, Dexamethasone                |
| GEMOX                | Gemcitabine, Oxaliplatin                                      |
| RICE                 | Rituximab, Ifosfamide, Cisplatin, Etoposide                   |
| DICE                 | Dexamethasone, Ifosfamide, Cisplatin, Etoposide               |

**Supplementary Table 2. Ratio of B cells in the peripheral blood of each patient after CAR-T infusion**

| Patient No. | Percentage of B cells in peripheral blood after CAR-T infusion (%) |        |        |        |         |         |         |
|-------------|--------------------------------------------------------------------|--------|--------|--------|---------|---------|---------|
|             | Day10                                                              | Day 14 | Day 21 | Day 28 | Month 2 | Month 3 | Month 4 |
| BBz-1       | 1.31                                                               | 0.21   | 0.57   | 0.04   | 0.4     | 1.13    | 0.2     |
| BBz-2       | 0.09                                                               | 0.07   | 0.02   | 0.28   | 1.11    | 0.8     | -       |
| BBz-3       | 0.36                                                               | 1.55   | 0.09   | 0.32   | 0.08    | 0.64    | 1.54    |
| 28z-1       | 0.32                                                               | 0.26   | 0.52   | 0.23   | 0.38    | 63.86   | 31.51   |
| 28z-2       | 0.24                                                               | 0      | 0.18   | 0.2    | 0.93    | 2.46    | 9.74    |
| 28z-3       | 3.24                                                               | -      | -      | -      | -       | -       | -       |
| BBz-4       | 0.69                                                               | 3.04   | 1.31   | 0.56   | 0.28    | 0.09    | 0       |
| BBz-5       | 1.57                                                               | 0.8    | 0.19   | 0.68   | 3.41    | 12.62   | 19.67   |
| BBz-6       | 1.63                                                               | 1.25   | 0.13   | 0.42   | 0.11    | 4.26    | 7.95    |

**Supplementary Table 3. The concentration of cytokines in peripheral blood and cerebrospinal fluid of patient 28z-2**

|                             | IL-2 | IL-4 | IL-6   | IL-10 | TNF  | IFN- $\gamma$ | IL-17A |
|-----------------------------|------|------|--------|-------|------|---------------|--------|
| Peripheral blood (pg/mL)    | 0.87 | 0.78 | 146.84 | 11.44 | 0.32 | 0.77          | -0.23  |
| Cerebrospinal fluid (pg/mL) | 0.91 | 0.26 | 313.09 | 15.11 | 0.32 | -0.61         | -0.10  |

**Supplementary Table 4. The blood routine indexes and C-reactive protein level in each patient**

| Patient No.  | Day | Hb (g/L) | RBC (10 <sup>12</sup> /L) | WBC (10 <sup>9</sup> /L) | LYM (10 <sup>9</sup> /L) | PMN (10 <sup>9</sup> /L) | PLT (10 <sup>9</sup> /L) | CRP (mg/L) |
|--------------|-----|----------|---------------------------|--------------------------|--------------------------|--------------------------|--------------------------|------------|
| Normal level |     | 120-160  | 3.5-5.5                   | 4-10                     | 1-5                      | 2-8                      | 100-350                  | < 8        |
| BBz-1        | -3  | 130      | 4.6                       | 2.46                     | 0.23                     | 2.01                     | 167                      | 3.3        |
|              | 4   | 150      | 5.29                      | 2.49                     | 0.52                     | 1.57                     | 182                      | 0.8        |
|              | 7   | 147      | 5.15                      | 2.14                     | 0.56                     | 1.01                     | 178                      | 1.6        |
|              | 10  | 146      | 5.1                       | 2.83                     | 1.43                     | 0.89                     | 211                      | 2.2        |
|              | 14  | 151      | 5.21                      | 3.04                     | 1.13                     | 1.37                     | 264                      | 1.4        |
|              | 21  | 147      | 4.98                      | 4.55                     | 0.72                     | 3.12                     | 151                      | -          |
|              | 28  | 151      | 5.28                      | 4.67                     | 1.02                     | 3.13                     | 169                      | 1.5        |
|              | 60  | 149      | 5.11                      | 4.96                     | 1.24                     | 3.04                     | 221                      | 3.3        |
|              | 90  | 147      | 5                         | 6.33                     | 1.76                     | 3.68                     | 206                      | 2.3        |
|              | 120 | 142      | 4.86                      | 5.48                     | 1.62                     | 3.19                     | 191                      | 1.7        |
| BBz-2        | -3  | 134      | 4.49                      | 4.09                     | 0.08                     | 3.8                      | 191                      | 8.5        |
|              | 4   | 124      | 4.28                      | 2.77                     | 0.13                     | 2.27                     | 186                      | 5.1        |
|              | 7   | 138      | 4.46                      | 2.01                     | 0.21                     | 1.41                     | 207                      | -          |
|              | 10  | 139      | 4.73                      | 3.13                     | 0.72                     | 1.86                     | 232                      | 7.6        |
|              | 14  | 121      | 4.07                      | 2.65                     | 0.29                     | 1.9                      | 235                      | 5.4        |
|              | 21  | 140      | 4.75                      | 5.12                     | 0.5                      | 3.97                     | 212                      | 11.4       |
|              | 28  | 131      | 4.45                      | 5.36                     | 0.89                     | 3.78                     | 196                      | 25.9       |
|              | 42  | 143      | 4.91                      | 6.63                     | 1.42                     | 4.45                     | 286                      | 17.6       |
|              | 60  | 128      | 4.36                      | 4.21                     | 0.6                      | 3.16                     | 205                      | 17.6       |
|              | 90  | 129      | 4.59                      | 3.12                     | 0.69                     | 1.9                      | 261                      | 35.7       |
| BBz-3        | -3  | 99       | 3.56                      | 2.34                     | 1.06                     | 1.1                      | 141                      | 10.4       |
|              | 4   | 102      | 3.53                      | 2.08                     | 0.66                     | 1.02                     | 174                      | 5.3        |
|              | 7   | 118      | 3.95                      | 2.08                     | 0.59                     | 1.04                     | 203                      | 8.5        |
|              | 10  | 116      | 3.97                      | 3.06                     | 0.65                     | 1.68                     | 204                      | 6          |
|              | 14  | 122      | 4.12                      | 2.53                     | 0.72                     | 1.58                     | 184                      | 12.3       |
|              | 21  | 129      | 4.33                      | 2.34                     | 0.93                     | 1                        | 174                      | 1.6        |
|              | 28  | 126      | 4.23                      | 3.69                     | 1.8                      | 1.5                      | 133                      | 1.9        |
|              | 60  | 144      | 4.73                      | 4.07                     | 1.73                     | 1.88                     | 164                      | 2.5        |
|              | 90  | 134      | 4.44                      | 5.19                     | 1.54                     | 3.14                     | 209                      | 42.1       |
|              | 120 | 153      | 4.97                      | 4.5                      | 1.66                     | 2.26                     | 205                      | 3.1        |
| 28z-1        | -3  | 133      | 4.01                      | 3.35                     | 0.13                     | 3.03                     | 60                       | 0.3        |
|              | 4   | 122      | 3.69                      | 2.23                     | 0.21                     | 1.72                     | 87                       | 18.7       |
|              | 7   | 113      | 3.37                      | 3.92                     | 0.23                     | 3.34                     | 58                       | 38.7       |
|              | 10  | 106      | 3.19                      | 8.27                     | 1.58                     | 5.31                     | 78                       | -          |
|              | 14  | 120      | 3.64                      | 4.62                     | 0.84                     | 2.9                      | 182                      | 6          |
|              | 21  | 138      | 4.03                      | 3.37                     | 0.64                     | 2.39                     | 164                      | 0.5        |
|              | 28  | 130      | 3.86                      | 3.06                     | 0.74                     | 2.01                     | 63                       | 0.7        |
|              | 60  | 135      | 3.83                      | 4.12                     | 1.13                     | 2.49                     | 101                      | 0.7        |
|              | 90  | 149      | 4.27                      | 3.58                     | 0.92                     | 2.24                     | 108                      | 0.4        |
|              | 120 | 143      | 4.07                      | 4.69                     | 0.95                     | 3.47                     | 91                       | 0.6        |
| 28z-2        | -3  | 90       | 2.87                      | 1.34                     | 0.15                     | 1.06                     | 119                      | 1.7        |
|              | 4   | 76       | 2.41                      | 1.21                     | 0.51                     | 0.31                     | 115                      | 16.4       |
|              | 7   | 76       | 2.42                      | 3.54                     | 0.13                     | 3.31                     | 77                       | 107.5      |
|              | 10  | 73       | 2.35                      | 8.17                     | 0.59                     | 7.05                     | 65                       | -          |
|              | 14  | 74       | 2.41                      | 7.45                     | 0.25                     | 6.76                     | 67                       | 13.1       |



|       |     |     |      |       |      |      |     |      |
|-------|-----|-----|------|-------|------|------|-----|------|
|       | 21  | 92  | 2.85 | 1.75  | 0.71 | 0.75 | 104 | 2.2  |
|       | 28  | 98  | 3.07 | 2.09  | 1.05 | 0.71 | 87  | 0.2  |
|       | 60  | 106 | 3.07 | 1.1   | 0.53 | 0.41 | 66  | 0.1  |
|       | 90  | 98  | 2.88 | 1.77  | 0.71 | 0.77 | 139 | 2.7  |
|       | 120 | 115 | 3.36 | 2.3   | 0.64 | 1.41 | 139 | -    |
| 28z-3 | -3  | 129 | 4.12 | 3.02  | 0.05 | 2.84 | 183 | 52.8 |
|       | 4   | 112 | 3.66 | 0.69  | 0.21 | 0.45 | 156 | -    |
|       | 7   | 119 | 3.79 | 4.18  | 0.25 | 3.06 | 162 | 52.7 |
|       | 10  | 120 | 3.81 | 8.95  | 0.19 | 7.68 | 136 | -    |
| BBz-4 | -3  | 107 | 3.34 | 2.2   | 0.05 | 2.03 | 59  | 4.9  |
|       | 4   | 98  | 3.18 | 1.4   | 0.17 | 1.07 | 89  | 77.4 |
|       | 7   | 91  | 2.91 | 6.47  | 1.61 | 4.43 | 93  | 74.6 |
|       | 10  | 101 | 3.21 | 2.63  | 0.93 | 1.35 | 131 | 31.1 |
|       | 14  | 103 | 3.3  | 2.27  | 0.47 | 1.47 | 133 | 4.6  |
|       | 21  | 122 | 3.87 | 3.85  | 0.72 | 2.65 | 90  | 0.8  |
|       | 28  | 122 | 3.92 | 2.67  | 0.72 | 1.5  | 98  | 1.1  |
|       | 60  | 137 | 4.3  | 4.72  | 1.22 | 2.97 | 99  | 1.7  |
| BBz-5 | -3  | 123 | 3.87 | 6.46  | 0.13 | 95   | 150 | 29.8 |
|       | 4   | 122 | 3.28 | 2.19  | 0.18 | 1.57 | 161 | 5.9  |
|       | 7   | 108 | 3.33 | 3.31  | 1.31 | 1.6  | 142 | 43.8 |
|       | 10  | 125 | 3.94 | 2.91  | 1.65 | 26.8 | 209 | 14.6 |
|       | 14  | 139 | 4.38 | 6.35  | 0.35 | 4.97 | 188 | 9.3  |
|       | 21  | 129 | 4.03 | 3.36  | 0.77 | 2.21 | 143 | 2.3  |
|       | 28  | 124 | 3.78 | 3.63  | 1    | 2.07 | 218 | -    |
|       | 60  | 144 | 4.4  | 4.52  | 1.36 | 2.7  | 171 | 0.7  |
| BBz-6 | -3  | 85  | 3.61 | 4.68  | 0.08 | 4.45 | 289 | 1.7  |
|       | 4   | 89  | 3.76 | 2.61  | 0.43 | 1.71 | 288 | 0.4  |
|       | 7   | 87  | 3.71 | 3.28  | 0.39 | 2.33 | 285 | 0.5  |
|       | 10  | 86  | 3.66 | 16.19 | 1.61 | 82.4 | 329 | 0.9  |
|       | 14  | 96  | 4.12 | 3.93  | 0.78 | 2.58 | 386 | 1    |
|       | 21  | 100 | 4.52 | 2.89  | 1.12 | 1.54 | 306 | 0.5  |
|       | 28  | 90  | 3.81 | 2     | 0.79 | 1    | 287 | -    |
|       | 60  | 86  | 3.96 | 2.66  | 1.11 | 1.2  | 354 | 0.6  |

Abbreviations: Hb, hemoglobin; RBC, red blood cell; WBC, white blood cell; LYM, lymphocyte; PMN, neutrophil; PLT, platelet; CRP, C-reactive protein
